# Supplementary material for: Platelet-rich concentrate in serum free medium enhances osteogenic differentiation of bone marrow-derived human mesenchymal stromal cells
Source: PeerJ. 2016 Sep 7;4:e2347. doi: 10.7717/peerj.2347 (PMC5018671; doi:10.7717/peerj.2347)
Supplement: Data S1 [file peerj-04-2347-s001.xlsx]

## Sheet: ALP
FBS- Fetal Bovine Serum
PRC- Platelet Rich Concentrate
OM - Osteogenic Medium
Gene Expression
	FBS	PRC	OST M			FBS	PRC	OST M			FBS	PRC	OST M			FBS	PRC	OST M
	2^(-ΔΔCT)	2^(-ΔΔCT)	2^(-ΔΔCT)			2^(-ΔΔCT)	2^(-ΔΔCT)	2^(-ΔΔCT)			2^(-ΔΔCT)	2^(-ΔΔCT)	2^(-ΔΔCT)			2^(-ΔΔCT)	2^(-ΔΔCT)	2^(-ΔΔCT)
8 days	0.00400342	0.0171689	0.0123333		8 days	0.00365211	0.0141232	0.0131239		8 days	0.00425143	0.0131218	0.0145238		8 days	0.00318423	0.0161372	0.0122781
16 days	0.0123779	0.0668036	0.0516073		16 days	0.0131214	0.087438	0.0534784		16 days	0.0121364	0.0727362	0.0543462		16 days	0.0137248	0.0717318	0.0629414
24 days	0.0138691	0.0512346	0.044954		24 days	0.0121002	0.0459721	0.0482316		24 days	0.00921832	0.0402128	0.0321325		24 days	0.0133718	0.0571839	0.0431942
					SD
	FBS	PRC	OM			FBS	PRC	OST M
8 days	0.0037728	0.0151378	0.0130648		8 days	0.000463053	0.00184554	0.00104658
16 days	0.0128401	0.0746774	0.0555933		16 days	0.000723548	0.00889332	0.00503025
24 days	0.0121399	0.0486509	0.0421281		24 days	0.00208525	0.00725409	0.00698303
	FBS	PRC	OST M			FBS	PRC	OST M			FBS	PRC	OST M			FBS	PRC	OST M
8 days	1	4.28857	3.0807		8 days	1	3.86713	3.59351		8 days	1	3.08644	3.41621		8 days	1	5.06785	3.85591
16 days	1	5.397	4.1693		16 days	1	6.66377	4.07566		16 days	1	5.99321	4.47794		16 days	1	5.22644	4.58596
24 days	1	3.69416	3.24131		24 days	1	3.79929	3.98602		24 days	1	4.36227	3.48572		24 days	1	4.27645	3.23024
AVERAGE					SD
	FBS	PRC	OM			FBS	PRC	OM
8 days		4.0775	3.48658		8 days		0.827003	0.325335
16 days		5.8201	4.32722		16 days		0.65146	0.243504
24 days		4.03304	3.48582		24 days		0.335219	0.353695

## Sheet: Osteocalcin
FBS- Fetal Bovine Serum
PRC- Platelet Rich Concentrate
OM - Osteogenic Medium
Gene Expression
	FBS	PRC	OST M			FBS	PRC	OST M			FBS	PRC	OST M			FBS	PRC	OST M
	2^(-ΔΔCT)	2^(-ΔΔCT)	2^(-ΔΔCT)			2^(-ΔΔCT)	2^(-ΔΔCT)	2^(-ΔΔCT)			2^(-ΔΔCT)	2^(-ΔΔCT)	2^(-ΔΔCT)			2^(-ΔΔCT)	2^(-ΔΔCT)	2^(-ΔΔCT)
8 days	0.015887	0.045154	0.050214		8 days	0.0172634	0.0523139	0.0734276		8 days	0.0192136	0.0492749	0.0685263		8 days	0.0178291	0.0491763	0.067531
16 days	0.021154	0.119078	0.119971		16 days	0.021243	0.114933	0.0917879		16 days	0.0258373	0.118633	0.116742		16 days	0.0261737	0.117519	0.118146
24 days	0.017842	0.127343	0.119003		24 days	0.0160382	0.125968	0.0962419		24 days	0.0169832	0.131237	0.115636		24 days	0.0152915	0.137184	0.118193
	FBS	PRC	OM			FBS	PRC	OST M
8 days	0.0175483	0.041143	0.0524993		8 days	0.00137759	0.00293706	0.0101402
16 days	0.023602	0.0947043	0.0886687		16 days	0.00277896	0.00185818	0.013315
24 days	0.0165387	0.0999599	0.0865431		24 days	0.00111088	0.00502345	0.0107804
	FBS	PRC	OST M			FBS	PRC	OST M			FBS	PRC	OST M				FBS	PRC	OST M
8 days	1	2.8422	3.1607		8 days	1	3.03033	4.25336		8 days	1	2.56458	3.56654			8 days	1	2.7582	3.78768
16 days	1	5.6291	5.67132		16 days	1	5.41038	4.32086		16 days	1	4.59154	4.51837			16 days	1	4.48998	4.5139
24 days	1	7.13726	6.66982		24 days	1	7.85427	6.00079		24 days	1	7.72743	6.80882			24 days	1	8.97125	7.72934
AVEARGE					SD
	FBS	PRC	OM			PRC	OST M
8 days	1	2.79883	3.69207		8 days	0.193215	0.455448
16 days	1	5.03025	4.75611		16 days	0.573726	0.617044
24 days	1	7.92255	6.80219		24 days	0.765764	0.711665

## Sheet: BMP2
FBS- Fetal Bovine Serum
PRC- Platelet Rich Concentrate
OM - Osteogenic Medium
Gene Expression
	FBS	PRC	OST M			FBS	PRC	OST M			FBS	PRC	OST M			FBS	PRC	OST M
	2^(-ΔΔCT)	2^(-ΔΔCT)	2^(-ΔΔCT)			2^(-ΔΔCT)	2^(-ΔΔCT)	2^(-ΔΔCT)			2^(-ΔΔCT)	2^(-ΔΔCT)	2^(-ΔΔCT)			2^(-ΔΔCT)	2^(-ΔΔCT)	2^(-ΔΔCT)
8 days	0.017366	0.073262	0.059721		8 days	0.021344	0.0882368	0.0783471		8 days	0.0292313	0.0871287	0.0672531		8 days	0.0257188	0.0751838	0.0739181
16 days	0.007599	0.083972	0.082238		16 days	0.007452	0.0921362	0.0531387		16 days	0.00874213	0.0681264	0.071234		16 days	0.0058162	0.0791528	0.0618299
24 days	0.006453	0.102776	0.063233		24 days	0.008374	0.110814	0.0768655		24 days	0.00546128	0.101752	0.068723		24 days	0.00671425	0.116183	0.071882
	FBS	PRC	OM			FBS	PRC	OST M
8 days	0.023415	0.0809528	0.0698098		8 days	0.0051645	0.00782365	0.00812576
16 days	0.00740233	0.0808468	0.0671102		16 days	0.00120444	0.0100315	0.0125025
24 days	0.00675063	0.107881	0.0701759		24 days	0.00120936	0.00685915	0.00571477
	FBS	PRC	OST M			FBS	PRC	OST M			FBS	PRC	OST M			FBS	PRC	OST M
8 days	1	4.2187	3.43896		8 days	1	4.13403	3.67068		8 days	1	2.98067	2.30072		8 days	1	2.9233	2.87409
16 days	1	11.0504	10.8222		16 days	1	12.364	7.1308		16 days	1	7.79288	8.14836		16 days	1	13.609	10.6306
24 days	1	15.9269	9.79901		24 days	1	13.2331	9.17906		24 days	1	18.6316	12.5837		24 days	1	17.3039	10.7059
AVERAGE					SD
	FBS	PRC	OM			FBS	PRC	OST M
8 days		3.56418	3.07111		8 days	0	0.708131	0.612949
16 days		11.2041	9.183		16 days	0	2.50259	1.83164
24 days		16.2739	10.5669		24 days	0	2.30842	1.48351

## Sheet: Col1
FBS- Fetal Bovine Serum
PRC- Platelet Rich Concentrate
OM - Osteogenic Medium
Gene Expression
	FBS	PRC	OST M			FBS	PRC	OST M			FBS	PRC	OST M			FBS	PRC	OST M
	2^(-ΔΔCT)	2^(-ΔΔCT)	2^(-ΔΔCT)			2^(-ΔΔCT)	2^(-ΔΔCT)	2^(-ΔΔCT)			2^(-ΔΔCT)	2^(-ΔΔCT)	2^(-ΔΔCT)			2^(-ΔΔCT)	2^(-ΔΔCT)	2^(-ΔΔCT)
8 days	0.025193	0.141051	0.111298		8 days	0.0291387	0.148328	0.109937		8 days	0.0258245	0.138366	0.0873215		8 days	0.0258183	0.162839	0.0771819
16 days	0.019282	0.058672	0.057396		16 days	0.0226253	0.103829	0.079384		16 days	0.0193255	0.0559823	0.0701224		16 days	0.0248491	0.0948391	0.0817336
24 days	0.026563	0.055697	0.047394		24 days	0.0254128	0.0558732	0.0483267		24 days	0.0241398	0.0673238	0.0574333		24 days	0.0259182	0.0719383	0.0571883
	FBS	PRC	OM			FBS	PRC	OST M
8 days	0.0264936	0.147646	0.0964347		8 days	0.00178811	0.0109681	0.0169012
16 days	0.0215205	0.0783307	0.072159		16 days	0.00271596	0.0245534	0.0110449
24 days	0.0255085	0.0627081	0.0525856		24 days	0.00102668	0.00821326	0.0054704
	FBS	PRC	OST M			FBS	PRC	OST M			FBS	PRC	OST M			FBS	PRC	OST M
8 days	1	5.59882	4.41781		8 days	1	5.09039	3.77289		8 days	1	5.35795	3.38134		8 days	1	6.30712	2.98943
16 days	1	3.04284	2.97666		16 days	1	4.58907	3.50864		16 days	1	2.89681	3.62849		16 days	1	3.8166	3.28919
24 days	1	2.09679	1.78421		24 days	1	2.19862	1.90167		24 days	1	2.78891	2.37919		24 days	1	2.77559	2.20649
AVERAGE					SD
	FBS	PRC	OM			FBS	PRP	OST M
8 days		5.58857	3.64037		8 days		0.522106	0.609044
16 days		3.58633	3.35075		16 days		0.780883	0.286241
24 days		2.46498	2.06789		24 days		0.368746	0.273389

## Sheet: Osteonectin
FBS- Fetal Bovine Serum
PRC- Platelet Rich Concentrate
OM - Osteogenic Medium
Gene Expression
	FBS	PRC	OST M			FBS	PRC	OST M			FBS	PRC	OST M			FBS	PRC	OST M
	2^(-ΔΔCT)	2^(-ΔΔCT)	2^(-ΔΔCT)			2^(-ΔΔCT)	2^(-ΔΔCT)	2^(-ΔΔCT)			2^(-ΔΔCT)	2^(-ΔΔCT)	2^(-ΔΔCT)			2^(-ΔΔCT)	2^(-ΔΔCT)	2^(-ΔΔCT)
8 days	0.126745	0.188696	0.456916		8 days	0.142525	0.192377	0.476894		8 days	0.117324	0.204235	0.492179		8 days	0.137819	0.198377	0.481792
16 days	0.04954	0.0819954	0.194482		16 days	0.042347	0.109274	0.21653		16 days	0.0323735	0.0923537	0.198623		16 days	0.0451377	0.0917481	0.238151
24 days	0.028028	0.143752	0.180211		24 days	0.0281365	0.106873	0.201863		24 days	0.0272541	0.107231	0.201725		24 days	0.0261928	0.136881	0.19572
	FBS	PRC	OM			FBS	PRC	OST M
8 days	0.131103	0.195921	0.476945		8 days	0.0113199	0.00682933	0.0147955
16 days	0.0423496	0.0938427	0.211946		16 days	0.00728007	0.0113296	0.0199182
24 days	0.0274028	0.123684	0.19488		24 days	0.000897306	0.0194095	0.01019
	FBS	PRC	OST M			FBS	PRC	OST M			FBS	PRC	OST M			FBS	PRC	OST M
8 days	1	1.48878	3.605		8 days	1	1.34978	3.34605		8 days	1	1.74078	4.19505		8 days	1	1.4394	3.49583
16 days	1	1.65514	3.92576		16 days	1	2.58043	5.11323		16 days	1	2.85276	6.13536		16 days	1	2.03263	5.2761
24 days	1	5.12886	6.42968		24 days	1	3.79838	7.17442		24 days	1	3.93449	7.40165		24 days	1	5.22592	7.47229
AVERAGE					SD
	FBS	PRC	OM			FBS	PRC	OST M
8 days		1.50469	3.66048		8 days	0	0.167584	0.371851
16 days		2.28024	5.11261		16 days	0	0.538504	0.909463
24 days		4.52191	7.11951		24 days	0	0.759949	0.477123

## Sheet: Osteopontin
FBS- Fetal Bovine Serum
PRC- Platelet Rich Concentrate
OM - Osteogenic Medium
Gene Expression
	FBS	PRC	OST M			FBS	PRC	OST M			FBS	PRC	OST M			FBS	PRC	OST M
	2^(-ΔΔCT)	2^(-ΔΔCT)	2^(-ΔΔCT)			2^(-ΔΔCT)	2^(-ΔΔCT)	2^(-ΔΔCT)			2^(-ΔΔCT)	2^(-ΔΔCT)	2^(-ΔΔCT)			2^(-ΔΔCT)	2^(-ΔΔCT)	2^(-ΔΔCT)
8 days	0.166606	2.00381	1.38538		8 days	0.153213	1.58734	1.59465		8 days	0.172469	1.81239	1.62395		8 days	0.17183	1.62819	1.18287
16 days	0.276312	3.85351	3.78161		16 days	0.284324	5.32139	2.83463		16 days	0.271378	4.17135	3.97264		16 days	0.291667	6.17269	3.18392
24 days	0.63728	11.7557	9.5059		24 days	0.662495	12.4823	9.12638		24 days	0.523137	11.1875	8.92024		24 days	0.691834	12.8814	10.1982
	FBS	PRC	OM			FBS	PRC	OST M
8 days	0.16603	1.75793	1.44671		8 days	0.00893882	0.190922	0.205484
16 days	0.28092	4.87973	3.4432		16 days	0.0089324	1.06798	0.526755
24 days	0.628687	12.0767	9.43768		24 days	0.0738131	0.754063	0.562041
	FBS	PRC	OST M			FBS	PRC	OST M			FBS	PRC	OST M			FBS	PRC	OST M
8 days	1	12.0272	8.31527		8 days	1	10.3604	10.408		8 days	1	10.5085	9.41588		8 days	1	9.47561	6.88397
16 days	1	13.9462	13.686		16 days	1	18.7159	9.96974		16 days	1	15.371	14.6388		16 days	1	21.1635	10.9163
24 days	1	18.4467	14.9164		24 days	1	18.8414	13.7758		24 days	1	21.3853	17.0514		24 days	1	18.6192	14.7408
AVERAGE					SD
	FBS	PRC	OM			FBS	PRC	OST M
8 days		10.5929	8.75579		8 days	0	1.05937	1.51255
16 days		17.2991	12.3027		16 days	0	3.2609	2.21628
24 days		19.3232	15.1211		24 days	0	1.38423	1.38114

## Sheet: RUNX2
FBS- Fetal Bovine Serum
PRC- Platelet Rich Concentrate
OM - Osteogenic Medium
Gene Expression
	FBS	PRC	OST M			FBS	PRC	OST M			FBS	PRC	OST M			FBS	PRC	OST M
	2^(-ΔΔCT)	2^(-ΔΔCT)	2^(-ΔΔCT)			2^(-ΔΔCT)	2^(-ΔΔCT)	2^(-ΔΔCT)			2^(-ΔΔCT)	2^(-ΔΔCT)	2^(-ΔΔCT)			2^(-ΔΔCT)	2^(-ΔΔCT)	2^(-ΔΔCT)
8 days	0.041582	0.321576	0.188755		8 days	0.0523748	0.316982	0.182624		8 days	0.0536513	0.297364	0.187114		8 days	0.0271542	0.238391	0.141534
16 days	0.005139	0.025756	0.024023		16 days	0.00567123	0.0311386	0.0316311		16 days	0.00614133	0.0373421	0.0227331		16 days	0.0038131	0.0278273	0.019163
24 days	0.00534	0.025505	0.027402		24 days	0.006215	0.0317263	0.0268332		24 days	0.0067235	0.0366836	0.0315917		24 days	0.00481371	0.0341828	0.0299382
	FBS	PRC	OM			FBS	PRC	OST M
8 days	0.0436906	0.293578	0.175007		8 days	0.0122818	0.0382605	0.0224652
16 days	0.00519117	0.030516	0.0243876		16 days	0.00100583	0.00506195	0.00524833
24 days	0.00577305	0.0320244	0.0289413		24 days	0.000857621	0.00479439	0.00222352
	FBS	PRC	OST M			FBS	PRC	OST M			FBS	PRC	OST M			FBS	PRC	OST M
8 days	1	7.73354	4.53934		8 days	1	6.05219	3.48686		8 days	1	5.54254	3.4876		8 days	1	8.77916	5.21223
16 days	1	5.01187	4.67464		16 days	1	5.49063	5.57747		16 days	1	6.08046	3.70166		16 days	1	7.29782	5.02557
24 days	1	4.77622	5.13146		24 days	1	5.1048	4.31749		24 days	1	5.45603	4.6987		24 days	1	7.10113	6.21936
Average					SD
	FBS	PRC	OM			FBS	PRC	OST M
8 days		7.02686	4.18151		8 days	0	1.49701	0.847443
16 days		5.97019	4.74484		16 days	0	0.987101	0.788507
24 days		5.60955	5.09175		24 days	0	1.03241	0.821999
