# Supplementary material for: Platelet-rich concentrate in serum free medium enhances osteogenic differentiation of bone marrow-derived human mesenchymal stromal cells
Source: PeerJ. 2016 Sep 7;4:e2347. doi: 10.7717/peerj.2347 (PMC5018671; doi:10.7717/peerj.2347)
Supplement: Data S4 [file peerj-04-2347-s004.xlsx]

## Sheet: Sheet1
PRC- Platelet Rich Concentrate
OM - Osteogenic Medium
Osteocalcin
	CTL	PRC	OM		CTL	PRC	OM		CTL	PRC	OM		CTL	PRC	OM
0 Day	0.253831	0.253831	0.253831	0 Day	0.213	0.213	0.213	0 Day	0.451121	0.451121	0.451121		0.362123	0.362123	0.362123
8 Days	0.651311	6.12568	4.1783	8 Days	1.0217	4.963	4.11443	8 Days	1.09193	5.73767	4.39716		1.04272	5.41654	5.11729
16 Days	3.18795	15.223	10.6572	16 Days	3.1332	15.1007	9.18028	16 Days	5.3296	16.9305	10.7894		4.26712	16.1737	11.1763
24 Days	3.59248	23.4526	12.1733	24 Days	4.187	21.389	12.9871	24 Days	5.48655	22.4865	13.8715		4.71537	19.3255	12.3362
DNA				DNA								DNA
	CTL	PRC	OM		CTL	PRC			CTL	PRC	OM		CTL	PRC	OM
0 Days	1.87107	1.87107	1.87107	0 Days	1.743	1.743	1.743	0 Days	2.011	2.011	2.011		1.83713	1.83713	1.83713
8 Days	4.94614	5.74177	5.31843	8 Days	5.371	6.213	6.27184	8 Days	6.1132	6.183	5.37284		5.31773	6.11726	5.12733
16 Days	8.56929	7.74056	5.42948	16 Days	9.652	8.0113	5.92385	16 Days	9.973	7.891	6.24929		8.16281	6.18419	6.17329
24 Days	7.70048	5.40702	4.32982	24 Days	8.3225	6.5213	4.1029	24 Days	9.8612	6.321	5.13099		8.17663	5.12671	6.17263
OSTEOCAL/DNA
	CTL	PRC	OM		CTL	PRC	OM		CTL	PRC	OM		CTL	PRC	OM
0 Days	0.135661	0.135661	0.135661	0 Days	0.122203	0.122203	0.122203	0 Days	0.224327	0.224327	0.224327		0.197113	0.197113	0.197113
8 Days	0.131681	1.06686	0.785626	8 Days	0.190225	0.798809	0.656016	8 Days	0.178618	0.927975	0.818405		0.196083	0.885451	0.998041
16 Days	0.37202	1.96665	1.96284	16 Days	0.324617	1.88493	1.54971	16 Days	0.534403	2.14554	1.72649		0.522751	2.61532	1.81043
24 Days	0.466527	4.33743	2.8115	24 Days	0.503094	3.27987	3.16536	24 Days	0.556377	3.55744	2.70348		0.576689	3.76957	1.99853
	AVERAGE				SD
		Control	PRC	OM		CTL	PRC	OM
	0 Day	0.169826	0.169826	0.169826	0 Day	0.0488198	0.0488198	0.0488198
	8 Days	0.174152	0.919774	0.814522	8 Days	0.0292294	0.111823	0.141013
	16 Days	0.438448	2.15311	1.76237	16 Days	0.105963	0.326797	0.172246
	24 Days	0.525672	3.73608	2.66972	24 Days	0.0501778	0.448252	0.489011
