# Supplementary material for: Platelet-rich concentrate in serum free medium enhances osteogenic differentiation of bone marrow-derived human mesenchymal stromal cells
Source: PeerJ. 2016 Sep 7;4:e2347. doi: 10.7717/peerj.2347 (PMC5018671; doi:10.7717/peerj.2347)
Supplement: Data S5 [file peerj-04-2347-s005.xls]

## Sheet: Sheet1
PRC- Platelet Rich Concentrate
OM - Osteogenic Medium
Absorbance
		Control	PRC	OM		Control	PRC	OM		Control	PRC	OM		Control	PRC	OM
		Absorbance
	0 Hour	0.059	0.059	0.059	0 Hour	0.024	0.024	0.024	0 Hour	0.031	0.031	0.031	0 Hour	0.057	0.057	0.057
	8 Days	0.112	0.331	0.355	8 Days	0.101	0.411	0.451	8 Days	0.108	0.485	0.511	8 Days	0.141	0.356	0.371
	16 Days	0.123	0.735	0.882	16 Days	0.13	0.869	0.901	16 Days	0.164	0.972	0.993	16 Days	0.127	0.752	0.881
	24 Days	0.114	2.288	2.471	24 Days	0.137	2.178	2.273	24 Days	0.167	1.978	2.01	24 Days	0.128	2.217	2.275
AVERAGE					SD
		Control	PRC	OM		Control	PRC	OM
	0 Hour	0.04275	0.04275	0.04275	0 Hour	0.0178582	0.0178582	0.0178582
	8 Days	0.1155	0.39575	0.422	8 Days	0.0175973	0.0682416	0.0726911
	16 Days	0.136	0.832	0.91425	16 Days	0.0188856	0.110722	0.0533003
	24 Days	0.1365	2.16525	2.25725	24 Days	0.0224277	0.132879	0.189195
